# Supplementary material
Source: PubMed Central journal article supplement (PMC9973253)

**a** Extended Data Figure 10a

1 2 3 4 5

GFP::3xFLAG::WAGO-3 - + - - +  
 PEI-1::3xMYC - - + - +  
 PEI-2::3xHA - - - + +

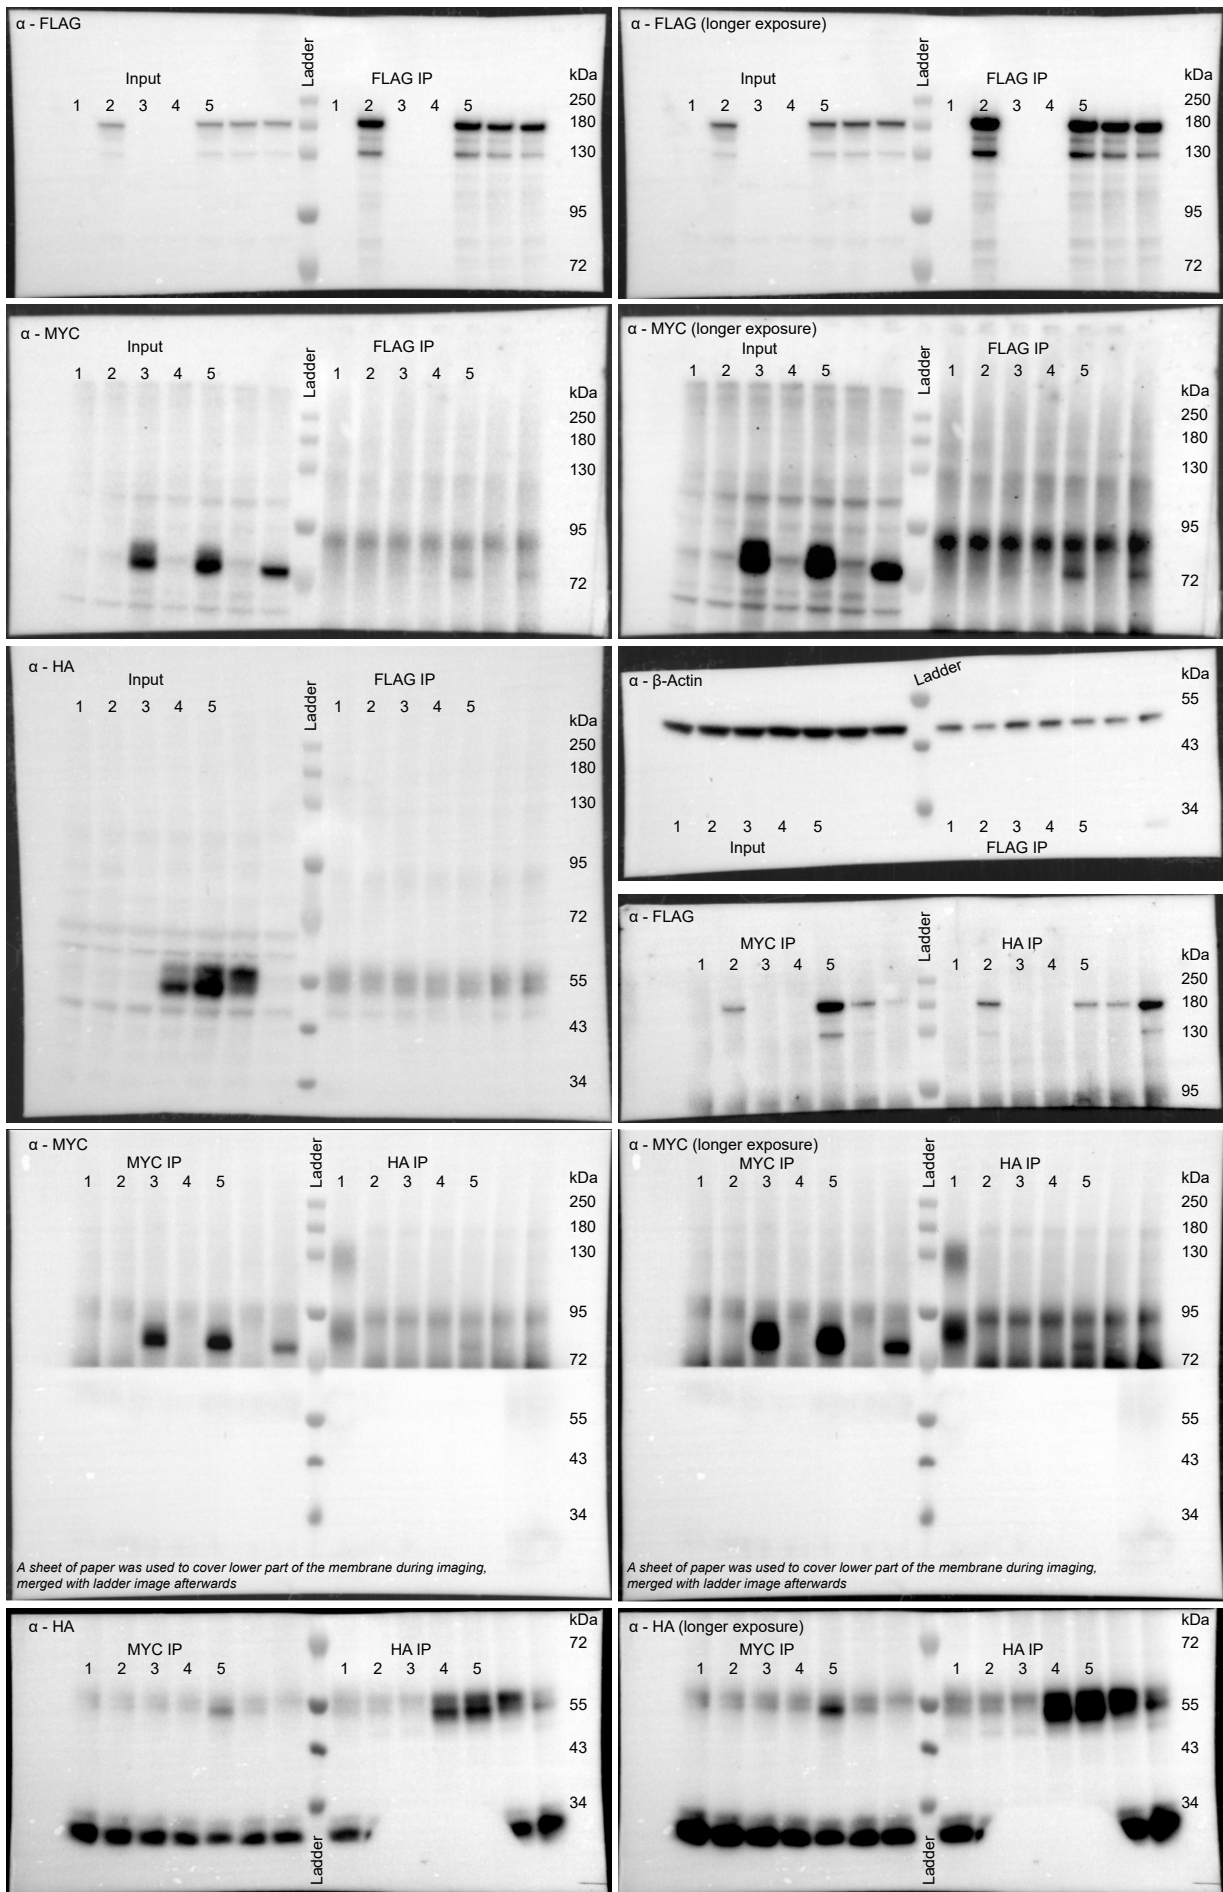

**b** Extended Data Figure 10b

1 2 3 4 5 6 7 8 9 10

|                   |   |    |     |      |            |   |    |     |      |            |
|-------------------|---|----|-----|------|------------|---|----|-----|------|------------|
|                   |   |    |     |      |            |   |    |     |      |            |
|                   |   |    |     |      |            |   |    |     |      |            |
| PEI-2-HA-eGFP:    | - | FL | BTB | BACK | BTB + BACK | - | FL | BTB | BACK | BTB + BACK |
| 3xFLAG-eGFP:      | + | -  | -   | -    | -          | + | -  | -   | -    | -          |
| PEI-1-mCherry-FL: | + | +  | +   | +    | +          | - | -  | -   | -    | -          |

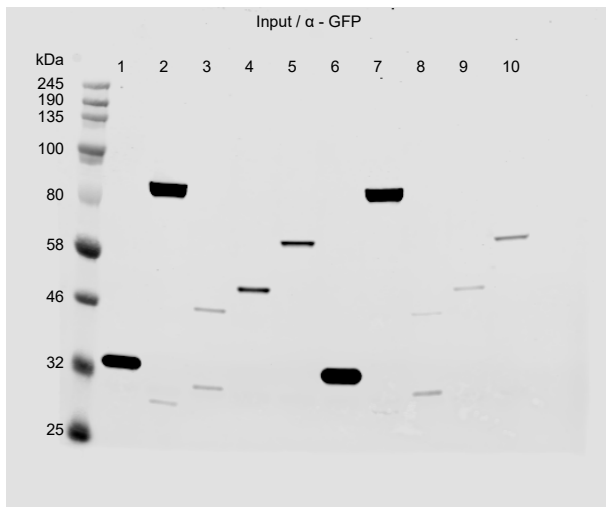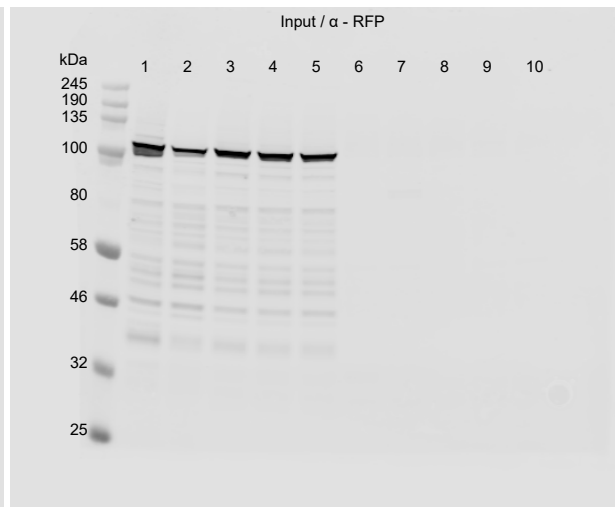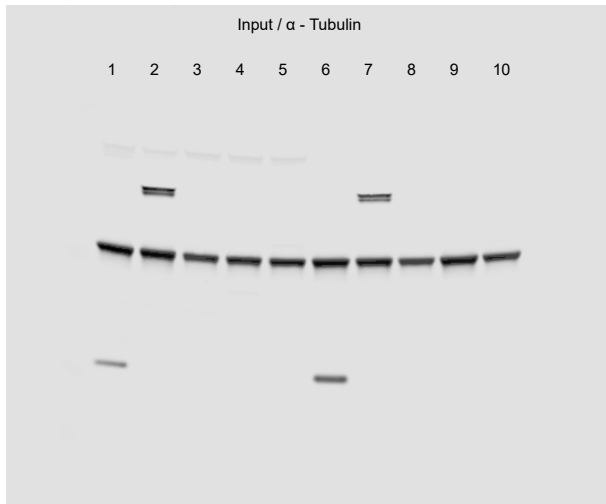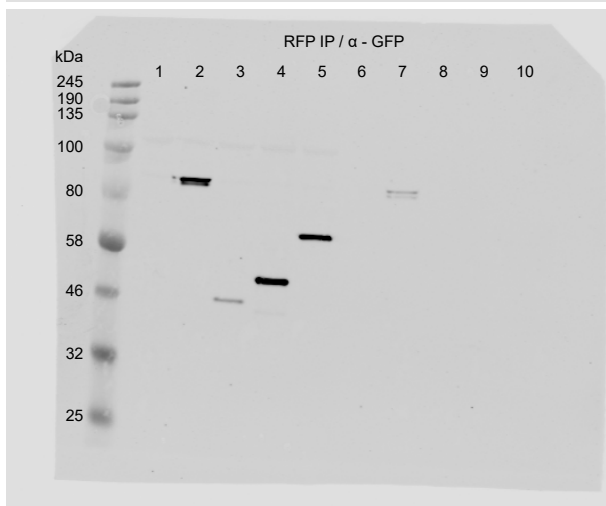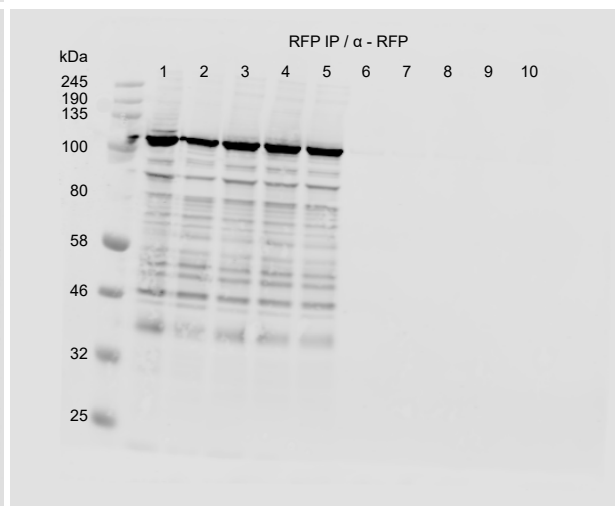

**c** Extended Data Figure 10h

1 2 3 4 5 6

2-BP ( $\mu\text{M}$ ): 0 10 25 50 100 200  
 PEI-1-mCherry-FL: + + + + + +

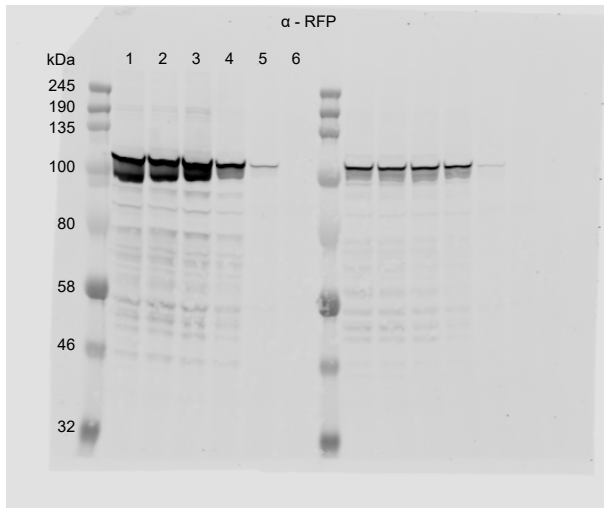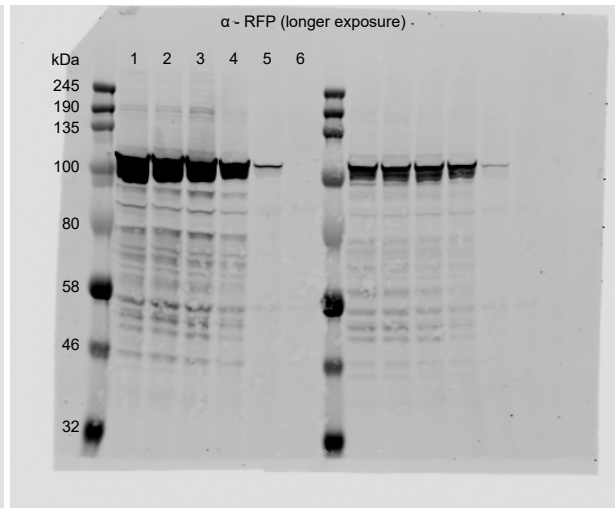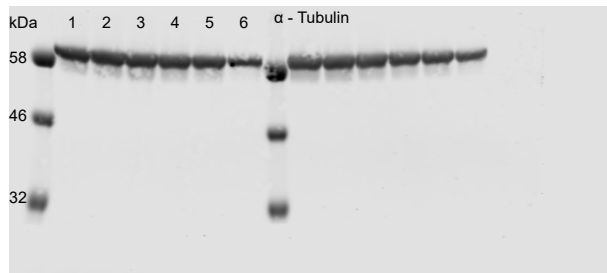

**d** Extended Data Figure 10i

1 2 3 4 5 6

2-BP ( $\mu\text{M}$ ): 0 10 25 50 100 200  
 PEI-2-HA-eGFP: + + + + + +

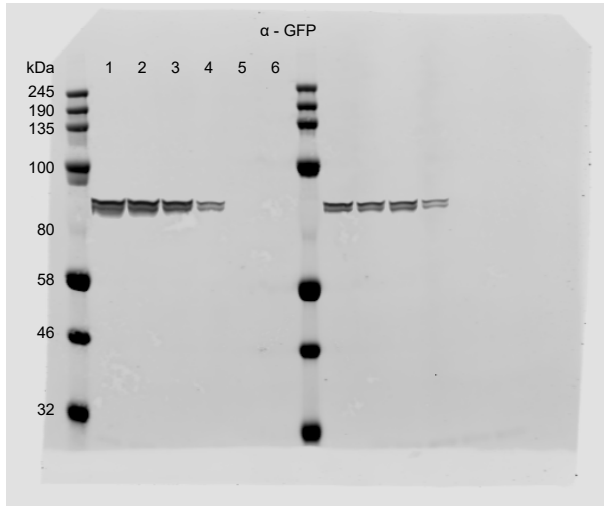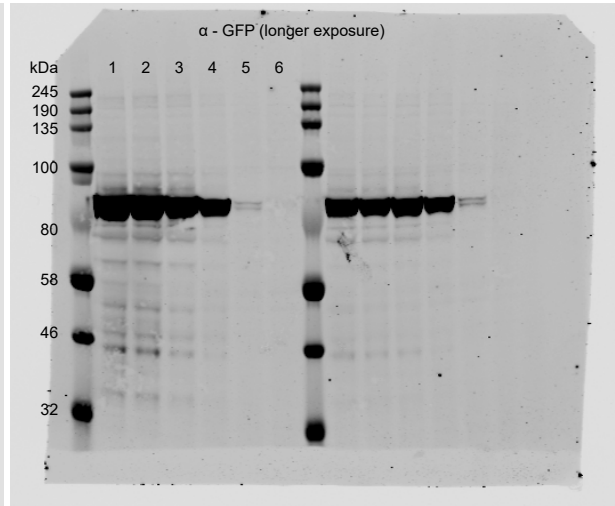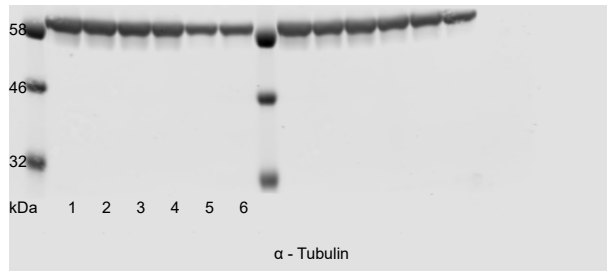

Supplement: NIHMS1871343-supplement-1871343_RawBlots_Extended_Data_Fig_10.pdf [file NIHMS1871343-supplement-1871343_RawBlots_Extended_Data_Fig_10.pdf]
