# Supplementary material
Source: PubMed Central journal article supplement (PMC9973253)
Supplement: NIHMS1871343-supplement-1871343_RS.pdf [file NIHMS1871343-supplement-1871343_RS.pdf]

## Reporting Summary

Nature Portfolio wishes to improve the reproducibility of the work that we publish. This form provides structure for consistency and transparency in reporting. For further information on Nature Portfolio policies, see our [Editorial Policies](#) and the [Editorial Policy Checklist](#).

### Statistics

For all statistical analyses, confirm that the following items are present in the figure legend, table legend, main text, or Methods section.

- |                                     |                                                                                                                                                                                                                                                                                                |
|-------------------------------------|------------------------------------------------------------------------------------------------------------------------------------------------------------------------------------------------------------------------------------------------------------------------------------------------|
| n/a                                 | Confirmed                                                                                                                                                                                                                                                                                      |
| <input type="checkbox"/>            | <input checked="" type="checkbox"/> The exact sample size ( $n$ ) for each experimental group/condition, given as a discrete number and unit of measurement                                                                                                                                    |
| <input type="checkbox"/>            | <input checked="" type="checkbox"/> A statement on whether measurements were taken from distinct samples or whether the same sample was measured repeatedly                                                                                                                                    |
| <input type="checkbox"/>            | <input checked="" type="checkbox"/> The statistical test(s) used AND whether they are one- or two-sided<br><i>Only common tests should be described solely by name; describe more complex techniques in the Methods section.</i>                                                               |
| <input checked="" type="checkbox"/> | <input type="checkbox"/> A description of all covariates tested                                                                                                                                                                                                                                |
| <input type="checkbox"/>            | <input checked="" type="checkbox"/> A description of any assumptions or corrections, such as tests of normality and adjustment for multiple comparisons                                                                                                                                        |
| <input type="checkbox"/>            | <input checked="" type="checkbox"/> A full description of the statistical parameters including central tendency (e.g. means) or other basic estimates (e.g. regression coefficient) AND variation (e.g. standard deviation) or associated estimates of uncertainty (e.g. confidence intervals) |
| <input type="checkbox"/>            | <input checked="" type="checkbox"/> For null hypothesis testing, the test statistic (e.g. $F$ , $t$ , $r$ ) with confidence intervals, effect sizes, degrees of freedom and $P$ value noted<br><i>Give <math>P</math> values as exact values whenever suitable.</i>                            |
| <input checked="" type="checkbox"/> | <input type="checkbox"/> For Bayesian analysis, information on the choice of priors and Markov chain Monte Carlo settings                                                                                                                                                                      |
| <input checked="" type="checkbox"/> | <input type="checkbox"/> For hierarchical and complex designs, identification of the appropriate level for tests and full reporting of outcomes                                                                                                                                                |
| <input type="checkbox"/>            | <input checked="" type="checkbox"/> Estimates of effect sizes (e.g. Cohen's $d$ , Pearson's $r$ ), indicating how they were calculated                                                                                                                                                         |

*Our web collection on [statistics for biologists](#) contains articles on many of the points above.*

### Software and code

Policy information about [availability of computer code](#)

#### Data collection

Data collection is described in detail in the method section.

MaxQuant quantitative proteomics software (version 1.5.2.8) (Cox, J. & Mann, M. MaxQuant enables high peptide identification rates, individualized p.p.b.-range mass accuracies and proteome-wide protein quantification. *Nat. Biotechnol.* 26, 1367–1372 (2008).)

ImageJ (v1.53i)

CRISPOR (v4.99)

LAS AF (v2.7.3.9723/v3.1.0)

VisiView (v5.0.0.10)

Huygens Remote Manager (v3.6)

IMOD (Kremer, J. R., Mastronarde, D. N. & McIntosh, J. R. Computer Visualization of Three-Dimensional Image Data Using IMOD. *J. Struct. Biol.* 116, 71–76 (1996).)

EggNode (Huerta-Cepas, J. et al. eggNOG 4.5: a hierarchical orthology framework with improved functional annotations for eukaryotic, prokaryotic and viral sequences. *Nucleic Acids Res.* 44, D286–D293 (2016).)

Composition Profiler (Vacic, V., Uversky, V. N., Dunker, A. K. & Lonardi, S. Composition Profiler: a tool for discovery and visualization of amino acid composition differences. *BMC Bioinformatics* 8, 211 (2007).)

EggNOG (v4.5.1) (Huerta-Cepas, J. et al. eggNOG 4.5: a hierarchical orthology framework with improved functional annotations for eukaryotic, prokaryotic and viral sequences. *Nucleic Acids Res.* 44, D286–D293 (2016).)

## Data analysis

Data analysis is described in detail in the method section.

smRNA-seq data was analyzed using the following publicly available tools and custom scripts. Comparisons between samples were done using R v3.5.1. For the full pipeline we refer to the text, code can be made available upon request.

Cutadapt v1.9

FASTX-Toolkit v0.0.14

Seqtk v1.2

Bowtie v1.2.2

BEDTools v2.27.1

HTSeq v0.9.0

SAMTools v1.5

deepTools v2.4.2

[https://github.com/Tunphie/SequencingTools/blob/main/smRNA\\_TypeCounter.py](https://github.com/Tunphie/SequencingTools/blob/main/smRNA_TypeCounter.py)

<https://github.com/Tunphie/SequencingTools/blob/main/CoverageOnProteinCodingGenes.py>

R (v3.5.2/v4.0.3), R-Studio (v1.1.453), ggplot2 (v3.2.1/v3.3.3), ggrepel (v0.8.1), stats (v3.5.2)

ImageJ (v1.53i), Icy (v2.1.4.0), IMARIS (v9.7.2)

EasyFRAP-web (Koulouras, G. et al. EasyFRAP-web: A web-based tool for the analysis of fluorescence recovery after photobleaching data. *Nucleic Acids Res.* 46, W467–W472 (2018).)

For manuscripts utilizing custom algorithms or software that are central to the research but not yet described in published literature, software must be made available to editors and reviewers. We strongly encourage code deposition in a community repository (e.g. GitHub). See the Nature Portfolio [guidelines for submitting code & software](#) for further information.

## Data

Policy information about [availability of data](#)

All manuscripts must include a [data availability statement](#). This statement should provide the following information, where applicable:

- Accession codes, unique identifiers, or web links for publicly available datasets
- A description of any restrictions on data availability
- For clinical datasets or third party data, please ensure that the statement adheres to our [policy](#)

The accession number for the smRNA-seq data generated in this study is PRJNA629991 (<https://dataview.ncbi.nlm.nih.gov/object/PRJNA629991?reviewer=72dsklt8i261719d2vq572tcq5>). The mass spectrometry proteomics data have been deposited to the ProteomeXchange Consortium via the PRIDE 37 partner repository with the dataset identifier PXD019099. CLEM data is available online: Mendeley Data, V1, doi: 10.17632/dgb8d7h2hz.1. Source data are provided with this study. All other data supporting the findings of this study are available from the corresponding author on reasonable request.

## Field-specific reporting

Please select the one below that is the best fit for your research. If you are not sure, read the appropriate sections before making your selection.

Life sciences  Behavioural & social sciences  Ecological, evolutionary & environmental sciences

For a reference copy of the document with all sections, see [nature.com/documents/nr-reporting-summary-flat.pdf](https://www.nature.com/documents/nr-reporting-summary-flat.pdf)

## Life sciences study design

All studies must disclose on these points even when the disclosure is negative.

### Sample size

Sample sizes for the worm experiments were not based on statistical methods but on previously published similar experiments yielding consistent and reproducible results.

Reference for Mis phenotype: de Albuquerque, B. F. M., Placentino, M. & Ketting, R. F. Maternal piRNAs Are Essential for Germline Development following De Novo Establishment of Endo-siRNAs in *Caenorhabditis elegans*. *Dev. Cell* 34, 448–456 (2015).

Sample sizes for mass spectrometry experiments were established as quadruplicates (LFQ), as is well-accepted in the proteomics field. Results for all IP-MS/MS experiments were derived from four biological replicates (4 separate extract preparations per condition). For immunoprecipitation and Western Blot experiments, animals were prepared from bleaching 1-2 high density plates of gravid adults per sample, L4 samples, young adult samples, and gravid adult samples were prepared from a pool of synchronized animals (200 µl per sample).

Reference for worm growing for mass spectrometry: Cordeiro Rodrigues RJ, de Jesus Domingues AM, Hellmann S, Dietz S, de Albuquerque BFM, Renz C, Ulrich HD, Sarkies P, Butter F, Ketting RF. PETISCO is a novel protein complex required for 21U RNA biogenesis and embryonic viability. *Genes Dev.* 2019 Jul 1;33(13-14):857-870. doi: 10.1101/gad.322446.118. Epub 2019 May 30. PMID: 31147388; PMCID: PMC6601512. The Western Blot of Figure 5h-i was prepared by picking 100 L4 stage animals for each sample.

For each microscopy experiment, 30-50 animals per condition were used to image gonads. For imaging isolated, male-derived germ cells, 10 cells per cell-type and condition were used for image analysis/quantification.

Reference for RNAe scoring: Luteijn, M. J. et al. Extremely stable Piwi-induced gene silencing in *Caenorhabditis elegans*. *EMBO J.* 31, 3422–3430 (2012).

The mortal germline experiments, 90 L2 or L3 animals were distributed to 15 NGM plates (90 mm diameter), resulting in six larvae per plate.

Reference for Mrt phenotype: Dietz S, Almeida MV, Nischwitz E, Schreier J, Viceconte N, Fradera-Sola A, Renz C, Ceron-Noriega A, Ulrich HD, Kappei D, Ketting RF, Butter F. The double-stranded DNA-binding proteins TEBP-1 and TEBP-2 form a telomeric complex with POT-1. *Nat Commun.* 2021 May 11;12(1):2668. doi: 10.1038/s41467-021-22861-2. PMID: 33976151; PMCID: PMC8113555.

Data exclusions No data were excluded from the analyses

Replication Results from IP-MS/MS experiments were verified by co-immunoprecipitation experiments followed by Western Blot, as well as co-localization studies. The IP-MS/MS and RIP-seq experiments were not repeated as the significant enrichments stem from four and three biological replicates, respectively.

For each microscopy experiment, 30-50 animals per condition were used to image gonads. For imaging isolated, male-derived germ cells, 10 cells per cell-type and condition were used for image analysis/quantification. Co-localization analyses of proximal gonads was performed with multiple animals and yielded similar results.

Mutator-induced sterility was scored using at least 40 F1 animals, which were randomly picked from 5 cross-fertilized hermaphrodites.

Five precise CLEM overlays of either spermatocytes or spermatids were used to assess PEI granule positioning within the cytoplasm.

FRAP experiments were performed on four or five foci.

We confirm that all attempts at replication were successful.

Randomization Mutator-induced sterility was scored using at least 40 F1 animals, which were randomly picked from 5 cross-fertilized hermaphrodites.

Further randomization is not relevant to this study, as distinct genotypes had to be generated before each experiment.

Blinding Blinding was not applicable for this study, because the genotype of the strains had to be assigned before experiments could be performed.

## Reporting for specific materials, systems and methods

We require information from authors about some types of materials, experimental systems and methods used in many studies. Here, indicate whether each material, system or method listed is relevant to your study. If you are not sure if a list item applies to your research, read the appropriate section before selecting a response.

### Materials & experimental systems

### Methods

- | n/a                                 | Involved in the study                                           |
|-------------------------------------|-----------------------------------------------------------------|
| <input type="checkbox"/>            | <input checked="" type="checkbox"/> Antibodies                  |
| <input type="checkbox"/>            | <input checked="" type="checkbox"/> Eukaryotic cell lines       |
| <input checked="" type="checkbox"/> | <input type="checkbox"/> Palaeontology and archaeology          |
| <input type="checkbox"/>            | <input checked="" type="checkbox"/> Animals and other organisms |
| <input checked="" type="checkbox"/> | <input type="checkbox"/> Human research participants            |
| <input checked="" type="checkbox"/> | <input type="checkbox"/> Clinical data                          |
| <input checked="" type="checkbox"/> | <input type="checkbox"/> Dual use research of concern           |

- | n/a                                 | Involved in the study                           |
|-------------------------------------|-------------------------------------------------|
| <input checked="" type="checkbox"/> | <input type="checkbox"/> ChIP-seq               |
| <input checked="" type="checkbox"/> | <input type="checkbox"/> Flow cytometry         |
| <input checked="" type="checkbox"/> | <input type="checkbox"/> MRI-based neuroimaging |

## Antibodies

Antibodies used

Monoclonal ANTI-FLAG® (clone M2), Art. No. F3165, Sigma-Aldrich  
 Myc-Tag (clone 9B11) Mouse mAb, Art. No. 2276, Cell Signaling Technology  
 Monoclonal anti-HA (clone 12CA5) mouse antibody, in-house production  
 anti-Histone H3, Art. No. H0164, Sigma-Aldrich  
 polyclonal ANTI-FLAG® antibody produced in rabbit, Art. No. F7425, Lot. No. 086M4803V, Sigma-Aldrich  
 Myc-Tag (clone 71D10) Rabbit mAb, Art. No. 2278, Cell Signaling Technology  
 polyclonal anti-HA-Tag antibody produced in rabbit, Art. No. SAB4300603, Lot. No. 5117T501, Sigma-Aldrich  
 β-Actin (clone D6A8) Rabbit mAb, Art. No. 8457, Cell Signaling Technology  
 Monoclonal Anti-α-Tubulin antibody produced in mouse (clone B-5-1-2), Art. No. T6074, Sigma-Aldrich  
 Polyclonal Anti-RFP Antibody Pre-adsorbed, produced in rabbit, Lot. #33754, Art. No. 600-4001-379, ROCKLAND  
 Monoclonal Anti-GFP Antibody (clone B-2), Santa Cruz, Cat. #sc-9996, Lot.#K1115  
 anti-mouse IgG, HRP-linked antibody, Art. No. 7076, Cell Signaling Technology  
 anti-rabbit IgG, HRP-linked antibody, Art. No. 7074, Cell Signaling Technology

Validation

Antibodies were used according to manufacturer's instructions. Every immuno-based approach included appropriate negative controls, e.g. biological samples that lack the epitope, which is recognized by a specific antibody. Western blot and IP functionality were confirmed using *C. elegans* extract containing a tagged fusion protein with the appropriate untagged control protein.

anti-FLAG (clone M2): no validation statement on manufacturer's website, western blot and IP functionality were confirmed using *C. elegans* extract containing a FLAG fusion protein.

anti-MYC (clone 9B11): Myc-Tag (9B11) Mouse mAb detects recombinant proteins containing the Myc epitope tag. The antibody recognizes the Myc-tag fused to either the amino or carboxy terminus of targeted proteins in transfected cells. The antibody may cross-react with c-myc protein. The antibody may weakly cross-react with a protein of unknown origin ~90kDa. Species Reactivity: All Species Expected.

Monoclonal anti-HA (clone 12CA5) antibody: Soluble lysate from exponentially-growing yeast cultures expressing HA-tagged proteins were separated on 4-15% gradient gel (BioRad). Proteins were blotted on a nitrocellulose membrane using semi-dry transfer (10 min High MW program on TransBlot Turbo blotter) and the membrane was blocked 1h in 5% skim milk/PBS/0.1% Tween-20. Primary antibodies: mouse anti-HA (in-house or Covance, 1:1000 o/N in blocking solution) at 4°C Secondary antibody: goat anti-mouse HRP-coupled (BIORAD 170-5047) 1:3000 1h at RT in blocking solution. The western blot was developed using ECL substrate Dura (Thermo, #34076). Exposure times as indicated in the figure. The experiment was performed by Katharina Bender from Brian Luke's group, IMB, Mainz, Germany.

anti-Histone H3 antibody: By immunoblotting, a working antibody dilution of 1:5,000-1:10,000 is recommended using a whole cell extract of the A431 human epidermoid carcinoma cell line, and a whole cell extract of the mouse fibroblast NIH3T3 cell line. By immunoblotting, a working antibody dilution of 1:2,500-1:5,000 is recommended using a whole cell extract of the rat pheochromocytoma PC12 cell line.

polyclonal ANTI-FLAG® antibody: Western Blot: Cell Line/Tissue Extract of *E. coli* expressed FLAG-tagged protein. Specification: PRE.2.ZQ5.10000015515.

MYC-Tag (clone 71D10) antibody: c-Myc Antibody detects endogenous levels of total c-Myc protein. This antibody is not recommended for detection of Myc-tagged fusion proteins (use Cell Signaling Technology cat. #2276 or #2278). Species Reactivity: Human, Mouse, Rat. Species predicted to react based on 100% sequence homology: Pig.

polyclonal anti-HA-Tag antibody: western blot and IP functionality were confirmed using *C. elegans* extract containing a HA fusion protein.

anti-β-Actin (clone D6A8): quality control by Sigma-Aldrich: working dilutions for western blot of at least 1:100 were determined using chicken gizzard extract.

Monoclonal Anti-α-Tubulin antibody (clone B-5-1-2): WB: Cell Line/Tissue Extract: HS-68 Human Foreskin Fibroblasts Cells Polyclonal Anti-RFP Antibody: This product was prepared from monospecific antiserum by immunoaffinity chromatography using Red Fluorescent Protein (Discosoma) coupled to agarose beads followed by solid phase adsorption(s) to remove any unwanted reactivities. Expect reactivity against RFP and its variants: mCherry, tdTomato, mBanana, mOrange, mPlum, mOrange and mStrawberry. Assay by immunoelectrophoresis resulted in a single precipitin arc against anti-Rabbit Serum and purified and partially purified Red Fluorescent Protein (Discosoma). No reaction was observed against Human, Mouse or Rat serum proteins.

Monoclonal Anti-GFP Antibody (clone B-2): no validation statement on manufacturer's website, western blot and IP functionality were confirmed using *C. elegans* extract containing a GFP fusion protein.

anti-mouse IgG, HRP-linked antibody: Application Key: WB-Western Blot IP-Immunoprecipitation IHC-Immunohistochemistry ChIP-Chromatin Immunoprecipitation IF-Immunofluorescence F-Flow Cytometry E-P-ELISA-Peptide. Species Cross-Reactivity Key: H-Human M-Mouse R-Rat Hm-Hamster Mk-Monkey Vir-Virus Mi-Mink C-Chicken Dm-D. melanogaster X-Xenopus Z-Zebrafish B-Bovine Dg-Dog Pg-Pig Sc-S. cerevisiae Ce-C. elegans Hr-Horse All-All Species Expected

anti-rabbit IgG, HRP-linked antibody: Application Key: WB-Western Blot IP-Immunoprecipitation IHC-Immunohistochemistry ChIP-Chromatin Immunoprecipitation IF-Immunofluorescence F-Flow Cytometry E-P-ELISA-Peptide. Species Cross-Reactivity Key: H-Human M-Mouse R-Rat Hm-Hamster Mk-Monkey Vir-Virus Mi-Mink C-Chicken Dm-D. melanogaster X-Xenopus Z-Zebrafish B-Bovine Dg-Dog Pg-Pig Sc-S. cerevisiae Ce-C. elegans Hr-Horse All-All Species Expected

## Eukaryotic cell lines

Policy information about [cell lines](#)

|                                                                      |                                                                      |
|----------------------------------------------------------------------|----------------------------------------------------------------------|
| Cell line source(s)                                                  | BmN4 cells are provided from Dr. Ramesh Pillai, University of Geneva |
| Authentication                                                       | BmN4 cells have not been authenticated.                              |
| Mycoplasma contamination                                             | Not tested.                                                          |
| Commonly misidentified lines<br>(See <a href="#">ICLAC</a> register) | No commonly misidentified cell lines were used.                      |

## Animals and other organisms

Policy information about [studies involving animals](#); [ARRIVE guidelines](#) recommended for reporting animal research

|                    |                                                                                                                                                                                                                                                                                                                                                                                                                               |
|--------------------|-------------------------------------------------------------------------------------------------------------------------------------------------------------------------------------------------------------------------------------------------------------------------------------------------------------------------------------------------------------------------------------------------------------------------------|
| Laboratory animals | <p><i>Caenorhabditis elegans</i> N2 Bristol; all mutants were derived from this strain. Hermaphrodites and males, and the following developmental stages were used: embryo, larval stage L4, young adult, gravid adult. The study involved the following <i>Caenorhabditis elegans</i> strains:</p> <p>N2<br/> USC1092<br/> RFK956<br/> USC1137<br/> RFK1252<br/> DG3226<br/> RFK1151<br/> YY538<br/> SX2078<br/> RFK1358</p> |
|--------------------|-------------------------------------------------------------------------------------------------------------------------------------------------------------------------------------------------------------------------------------------------------------------------------------------------------------------------------------------------------------------------------------------------------------------------------|

RFK578  
RFK1357  
NL1810  
RFK691  
RFK936  
NL917  
RFK652  
OH441  
RB1083  
RFK1364  
RFK750  
RFK1412  
RFK1413  
RFK848  
RFK921  
RFK1366  
RFK963  
RFK962  
RFK1032  
RFK1065  
RFK1027  
RFK1132  
RFK1356  
RFK1342  
RFK1350  
RFK1415  
RFK1416  
RFK1352  
RFK1355  
RFK926  
RFK1086  
SX922  
RFK233  
RFK237  
RFK1033  
RFK832  
RFK1064  
RFK870  
RFK1361  
RFK1360  
RFK788  
RFK820  
BA782  
DU23  
USC988  
RFK945  
NL5117  
RFK935  
RFK561  
RFK560  
RFK1148  
RFK1336  
RFK778  
RFK817  
RFK1365  
RFK933  
RFK1209  
RFK1359  
RFK1149  
RFK1017  
RFK1018  
RFK1030  
RFK1362  
RFK1062  
RFK1066  
RFK1131  
RFK1353  
RFK1354  
RFK1080  
RFK1081  
RFK1228  
RFK1084

Wild animals

the study did not involve wild animals

Field-collected samples

Ethics oversight

Note that full information on the approval of the study protocol must also be provided in the manuscript.
