# Supplementary material
Source: PubMed Central journal article supplement (PMC9973253)

**a** Extended Data Figure 4d

|                     | 1 | 2 | 3 | 4 |
|---------------------|---|---|---|---|
| PEI-1::3xMYC        | - | - | + | + |
| GFP::3xFLAG::WAGO-3 | - | + | - | + |

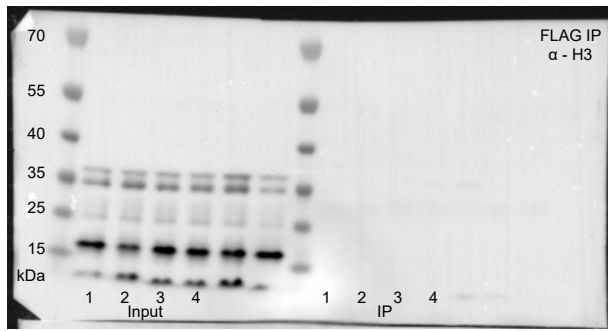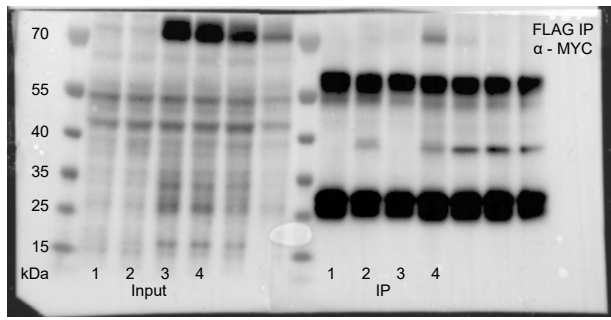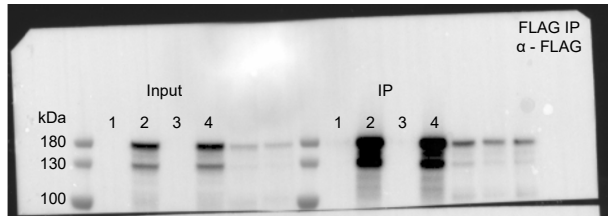

Supplement: NIHMS1871343-supplement-1871343_RawBlots_Extended_Data_Fig_4.pdf [file NIHMS1871343-supplement-1871343_RawBlots_Extended_Data_Fig_4.pdf]

**a** Figure 8b

|                         | 1 | 2 | 3 | 4 |
|-------------------------|---|---|---|---|
| PEI-2::3xHA             | - | + | + | + |
| <i>pei-1(ok1050)</i> IV | - | - | + | - |
| <i>spe-10(hc104)</i> V  | - | - | - | + |

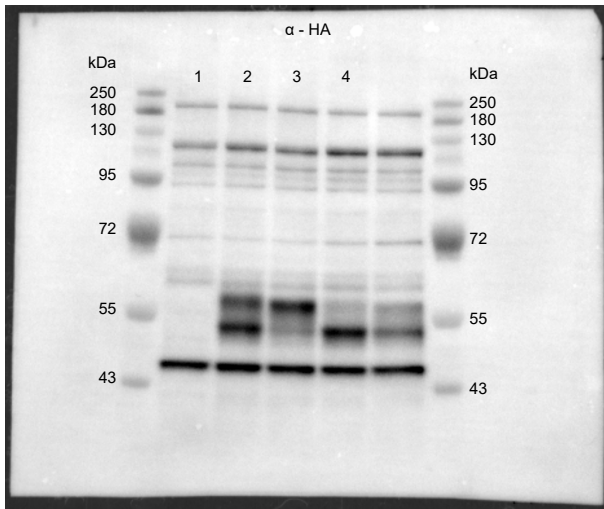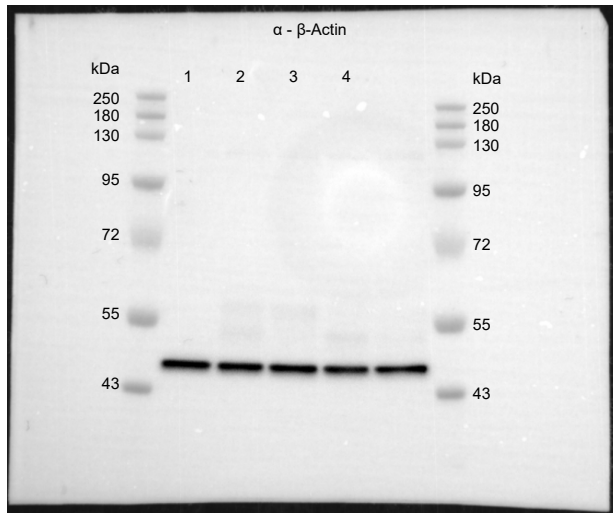

**b** Figure 8c

|                        | 1 | 2 | 3 | 4 |
|------------------------|---|---|---|---|
| PEI-1::3xMYC           | - | + | + | + |
| <i>pei-2(xf270)</i> V  | - | - | + | - |
| <i>spe-10(hc104)</i> V | - | - | - | + |

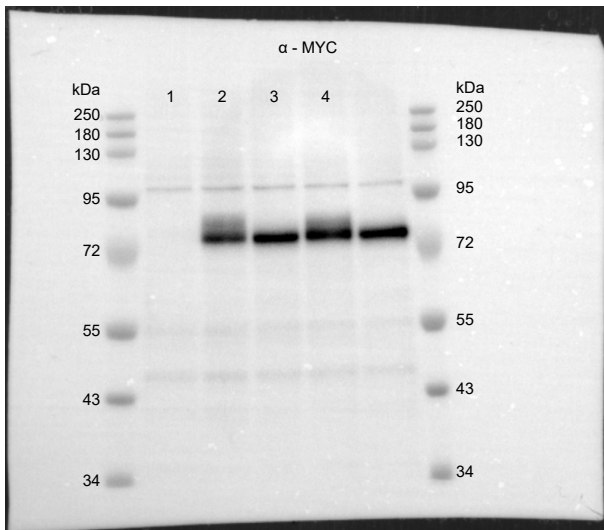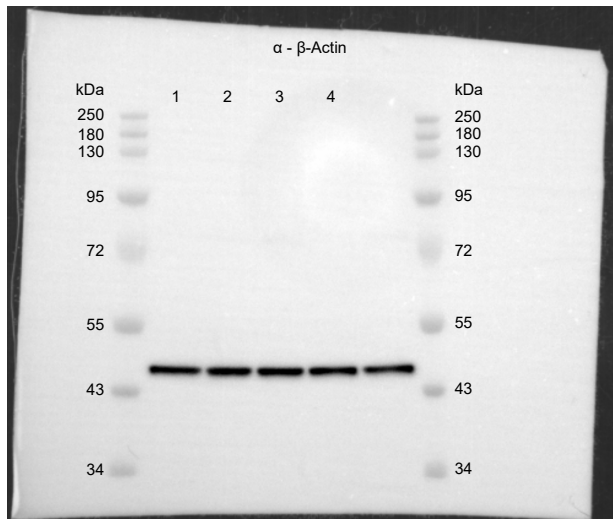

Supplement: NIHMS1871343-supplement-1871343_RawBlots_Fig_8.pdf [file NIHMS1871343-supplement-1871343_RawBlots_Fig_8.pdf]
